# Supplementary material for: Identification of a circRNA-miRNA-mRNA regulatory network for exploring novel therapeutic options for glioma
Source: PeerJ journal article supplement (doi:10.7717/peerj.11894), 2021-08-06

A

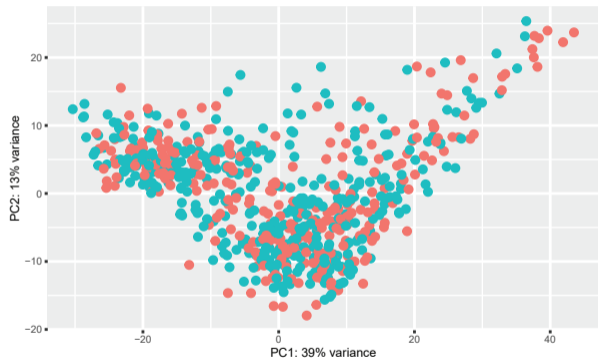

B

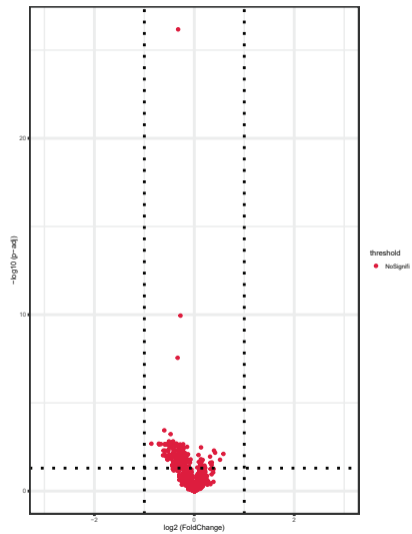

Supplement: supp_Fig1._gender_correlation_analysis_of_Target_mRNAs.pdf [file supp_Fig1._gender_correlation_analysis_of_Target_mRNAs.pdf]
