# Supplementary material for: Identification of a circRNA-miRNA-mRNA regulatory network for exploring novel therapeutic options for glioma
Source: PeerJ journal article supplement (doi:10.7717/peerj.11894), 2021-08-06

NT

Glioma

HNRNPA3

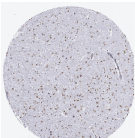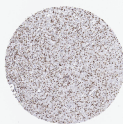

IP3K2

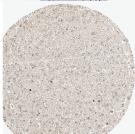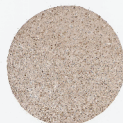

KPNA4

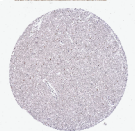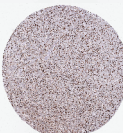

PAIP1

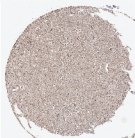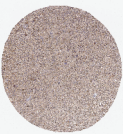

RCN1

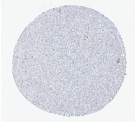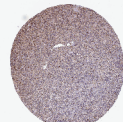

SEMA5A

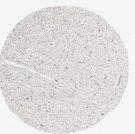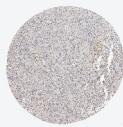

Supplement: supp_Fig2._HPA_confirmation_of_hub_genes_.pdf [file supp_Fig2._HPA_confirmation_of_hub_genes_.pdf]
