# Supplementary material for: Identification of a circRNA-miRNA-mRNA regulatory network for exploring novel therapeutic options for glioma
Source: PeerJ. 2021 Aug 6;9:e11894. doi: 10.7717/peerj.11894 (PMC8351580; doi:10.7717/peerj.11894)
Supplement: Supplemental Information 4 [file peerj-09-11894-s004.xlsx]

## Sheet: GSE165286-FPKM
gene_name	S16_Control	S17_Control	S18_Control	S21_Control	S5_GBM	S7_GBM	S9_GBM	S10_GBM	S11_GBM	S12_GBM	S14_GBM	S19_GBM	S22_GBM	SUM
MIR1200	2.44985	3.04158	1.18766	1.03125	0.525334	2.81946	1.0915	1.36988	0.864422	0.80638	2.87468	1.92766	0.138058	20.1277
MIR581	2.58382	1.94033	0.718019	1.53285	0.134057	3.14242	0.029937	1.90183	0.540859	0.305961	0.828252	0.670521	1.83125	16.1601
MIR640	0.077505	0.153168	0.818203	0	1.66099	0.879432	1.59236	1.58755	0.177567	0.740949	1.85667	1.92751	1.51327	12.9852
MIR5693	0.306477	1.32624	0	1.56672	1.35159	1.21077	1.86194	0.216557	0	0.996239	0.920725	0.942202	0.183892	10.8834
MIR599	0	0.978482	0.371445	0.333296	0	0.685627	0.945295	0.878215	1.36651	1.00522	2.0437	0.474217	0.55553	9.63753
MIR6867	1.29623	1.13635	0.838973	1.55708	0.49722	0.366945	0.327282	0.149984	0.168096	0.455171	0.213521	0.783934	0.832092	8.62288
MIR1205	0	0	0	0.06001	0.51402	0.78783	2.0682	0.312205	0.736841	0.950528	0.906356	0	0.506498	6.84249
MIR1248	0.181155	0.164912	0.140246	0.234294	0.140049	0.206263	0.10276	0.138634	0.205632	0.09661	0.19764	0.162869	0.203524	2.17459
MIR647	0.129048	0.095897	0.118462	0.167335	0.150663	0.220049	0.135393	0.027233	0.084485	0.128967	0.256736	0.246955	0.184508	1.94573
MIR935	0.223558	0.093315	0.135365	0.238133	0	0	0.17191	0.326794	0	0.172407	0.125381	0.145196	0.132684	1.76474
MIR586	0.064142	0	0	0.224722	0.331601	0.160036	0	0	0	0.098112	0.125381	0	0.687339	1.69133
MIR3925	0	0.391415	0	0.442042	0	0.400918	0	0	0.362228	0	0	0	0	1.5966
MIR767	0	0.513672	0.028392	0.298042	0	0	0	0	0	0	0	0	0	0.840106
MIR1303	0.210327	0	0	0.054106	0.454156	0	0	0	0	0	0	0	0	0.718589
MIR607	0.037416	0	0	0	0	0.234566	0	0	0	0	0	0	0	0.271982
